# Supplementary material for: Enhanced Recovery of Antioxidant Compounds from Hazelnut (Corylus avellana L.) Involucre Based on Extraction Optimization: Phytochemical Profile and Biological Activities
Source: PubMed Central journal article supplement (PMC6826866; doi:10.3390/antiox8100460), 2019-10-08
Supplement: antioxidants-08-00460-s001.pdf [file antioxidants-08-00460-s001.pdf]

**Supplementary Table S1.** Retention times and values of  $m/z$  for the individual polyphenolic compounds.

| <b>Phenolic compound</b> | <b><math>m/z</math></b> | <b>Retention time (min)</b> |
|--------------------------|-------------------------|-----------------------------|
| Caftaric acid            | 311                     | 3.5                         |
| Gentisic acid            | 179                     | 3.5                         |
| Caffeic acid             | 179                     | 5.6                         |
| Chlorogenic acid         | 353                     | 5.6                         |
| <i>p</i> -Coumaric acid  | 163                     | 9.5                         |
| Ferulic acid             | 193                     | 12.8                        |
| Sinapic acid             | 223                     | 15.0                        |
| Hyperoside               | 463                     | 18.6                        |
| Isoquercitrin            | 463                     | 19.6                        |
| Rutoside                 | 609                     | 20.7                        |
| Myricetin                | 317                     | 21.1                        |
| Fisetin                  | 285                     | 22.9                        |
| Quercitrin               | 447                     | 23.6                        |
| Quercetin                | 301                     | 26.8                        |
| Patuletin                | 331                     | 29.4                        |
| Luteolin                 | 285                     | 29.1                        |
| Kaempferol               | 285                     | 32.5                        |
| Apigenin                 | 279                     | 33.1                        |

**Supplementary Table S2.** Retention times and values of  $m/z$  for the individual polyphenolic compounds quantified by LC-MS method II.

| <b>Compounds</b>    | <b><math>m/z</math></b> | <b>Retention time (min)</b> |
|---------------------|-------------------------|-----------------------------|
| Epicatechin         | 289                     | 9.0                         |
| Catechin            | 289                     | 6.0                         |
| Syringic acid       | 197                     | 8.4                         |
| Gallic acid         | 169                     | 1.5                         |
| Protocatechuic acid | 153                     | 2.8                         |
| Vanillic acid       | 167                     | 6.7                         |

**Supplementary Table S3.** Retention times (RT) and specific ions of the phytosterols.

| <b>Phytosterol</b> | <b>RT (min)</b> | <b>M</b> | <b>M – H<sub>2</sub>O + H<sup>+</sup></b> |
|--------------------|-----------------|----------|-------------------------------------------|
| Ergosterol         | 3.2             | 396      | 379                                       |
| Brassicasterol     | 3.9             | 398      | 381                                       |
| Stigmasterol       | 4.9             | 412      | 395                                       |
| Campesterol        | 4.9             | 400      | 383                                       |
| β-Sitosterol       | 5.7             | 414      | 397                                       |

**Supplementary Table S4.** Regression equation coefficients for total bioactive compounds in hazelnut involucre extracts.

| Effect                            | Responses                               |                                          |                                           |                                       |
|-----------------------------------|-----------------------------------------|------------------------------------------|-------------------------------------------|---------------------------------------|
|                                   | Y <sub>1</sub> (Total Phenolic Content) | Y <sub>2</sub> (Total Flavonoid Content) | Y <sub>3</sub> (Condensed Tannin Content) | Y <sub>4</sub> (Antioxidant Activity) |
| Constant                          | <b>217.984</b>                          | <b>25.159</b>                            | <b>17.627</b>                             | <b>769.490</b>                        |
| X <sub>1</sub> (stirring time)    | -1.856                                  | -0.169                                   | -0.385                                    | -2.943                                |
| X <sub>2</sub> (pH)               | 2.950                                   | 0.661                                    | 0.716                                     | <b>100.698</b>                        |
| X <sub>3</sub> (water in solvent) | <b>131.450</b>                          | <b>13.046</b>                            | <b>10.009</b>                             | <b>551.116</b>                        |
| X <sub>1</sub> x X <sub>1</sub>   | 6.249                                   | 0.526                                    | 0.726                                     | 81.923                                |
| X <sub>3</sub> x X <sub>3</sub>   | <b>-31.751</b>                          | -3.016                                   | <b>-3.472</b>                             | -84.811                               |
| X <sub>2</sub> x X <sub>3</sub>   | -                                       | -                                        | -                                         | <b>91.948</b>                         |

For data in bold, p-value was <0.005, therefore statistically significant.

Supplementary Table S5. Quantitative evaluation of the recovery of main bioactive compounds in non-hydrolyzed and hydrolyzed samples of hazelnut involucre extracts.

| Sample code/<br>Bioactive<br>compound | Non-hydrolyzed samples |          |                  |                |                        |                  | Hydrolyzed samples       |                          |                          |                           |                          |                          |
|---------------------------------------|------------------------|----------|------------------|----------------|------------------------|------------------|--------------------------|--------------------------|--------------------------|---------------------------|--------------------------|--------------------------|
|                                       | Epicatechin            | Catechin | Syringic<br>acid | Gallic<br>acid | Protocatechuic<br>acid | Vanillic<br>acid | Epicatechin              | Catechin                 | Syringic acid            | Gallic acid               | Protocatechuic<br>acid   | Vanillic acid            |
| N1                                    | ND                     | ND       | ND               | ND             | ND                     | ND               | ND                       | ND                       | ND                       | ND                        | ND                       | ND                       |
| N2                                    | 0.161245               | 13.622   | 0.544025         | 5.29325        | 21.7316                | 3.10038          | ND                       | ND                       | 1.265 x 10 <sup>-6</sup> | 3.085 x 10 <sup>-5</sup>  | 3.348 x 10 <sup>-5</sup> | 7.899 x 10 <sup>-6</sup> |
| N3                                    | 0.109285               | 10.2814  | 0.406842         | 3.78198        | 14.5526                | 2.43934          | ND                       | ND                       | ND                       | ND                        | ND                       | ND                       |
| N4                                    | ND                     | ND       | ND               | ND             | ND                     | ND               | ND                       | ND                       | ND                       | ND                        | ND                       | ND                       |
| N5                                    | 1.48028                | 155.086  | 2.65383          | 55.3962        | 103.981                | 15.7851          | ND                       | ND                       | ND                       | ND                        | ND                       | ND                       |
| N6                                    | 3.61175                | 201.95   | 2.57709          | 63.593         | 131.153                | 16.6086          | ND                       | ND                       | ND                       | ND                        | ND                       | ND                       |
| N7                                    | 3.17511                | 158.064  | 2.77131          | 53.1407        | 124.579                | 21.1011          | ND                       | 1.980 x 10 <sup>-5</sup> | 1.190x 10 <sup>-5</sup>  | 6.960 x 10 <sup>-4</sup>  | 2.991 x 10 <sup>-4</sup> | 6.407 x 10 <sup>-5</sup> |
| N8                                    | 2.0507                 | 161.137  | ND               | 42.872         | 103.519                | 12.2973          | ND                       | ND                       | ND                       | ND                        | ND                       | ND                       |
| N9                                    | 3.48134                | 216.972  | 3.32771          | 69.0716        | 140.899                | 18.7113          | 3.286 x 10 <sup>-5</sup> | 5.835 x 10 <sup>-5</sup> | 1.497 x 10 <sup>-5</sup> | 10.279 x 10 <sup>-4</sup> | 5.014 x 10 <sup>-4</sup> | 0.00011248               |
| N10                                   | 1.62016                | 108.011  | 2.00567          | 37.151         | 70.5825                | 9.83373          | ND                       | 1.816 x 10 <sup>-5</sup> | 1.124 x 10 <sup>-5</sup> | 9.872 x 10 <sup>-4</sup>  | 4.362 x 10 <sup>-4</sup> | 0.000102659              |
| N11                                   | 1.64843                | 150.773  | 2.62852          | 53.2252        | 97.2631                | 14.5142          | ND                       | 4.618 x 10 <sup>-6</sup> | 1.491 x 10 <sup>-5</sup> | 9.259 x 10 <sup>-4</sup>  | 4.104 x 10 <sup>-4</sup> | 9.392 x 10 <sup>-5</sup> |
| N12                                   | 3.73195                | 243.025  | 5.53267          | 91.9302        | 227.373                | 25.4056          | ND                       | ND                       | ND                       | ND                        | ND                       | ND                       |
| N13                                   | 0.272933               | 19.9771  | 0.873456         | 11.8345        | 33.3216                | 4.70599          | ND                       | ND                       | ND                       | ND                        | ND                       | ND                       |
| N14                                   | ND                     | 78.0445  | 2.40167          | 44.2498        | 100.404                | 13.5972          | 2.694 x 10 <sup>-5</sup> | 7.058 x 10 <sup>-5</sup> | 9.818 x 10 <sup>-6</sup> | 8.0096 x 10 <sup>-4</sup> | 2.858 x 10 <sup>-4</sup> | 7.127x 10 <sup>-5</sup>  |
| N15                                   | 2.4124                 | 172.79   | 3.39555          | 54.205         | 119.09                 | 14.8084          | 1.885 x 10 <sup>-5</sup> | 3.732 x 10 <sup>-5</sup> | 1.011 x 10 <sup>-5</sup> | 6.888 x 10 <sup>-4</sup>  | 3.343 x 10 <sup>-4</sup> | 6.682 x 10 <sup>-5</sup> |
| N16                                   | 1.98295                | 159.987  | 2.64634          | 61.3946        | 103.949                | 12.4836          | ND                       | ND                       | ND                       | ND                        | ND                       | ND                       |
| N17                                   | 1.89834                | 186.77   | 3.78313          | 57.6435        | 116.706                | 15.3084          | ND                       | ND                       | ND                       | ND                        | ND                       | ND                       |

All results are expressed as µg bioactive compound per gram of dry weight hazelnut involucre.

**Supplementary Table S6.** Statistical parameters after data analyze and fit with factorial model for bioactive compounds in hazelnut involucre extracts.

| Quantifiable responses                                                                | Reproducibility | Source      | Degrees of freedom | Sum of squares | Mean square | F value | p value |
|---------------------------------------------------------------------------------------|-----------------|-------------|--------------------|----------------|-------------|---------|---------|
| Epicatechin (Y <sub>1</sub> )<br>(R <sup>2</sup> =0.79, Q <sup>2</sup> =0.51)         | 0.95            | Regression  | 5                  | 21.2182        | 4.24364     | 7.83307 | 0.003   |
|                                                                                       |                 | Lack of fit | 8                  | 5.26564        | 0.658205    | 8.66356 | 0.108   |
|                                                                                       |                 | Pure error  | 2                  | 0.151948       | 0.075974    |         |         |
| Catechin (Y <sub>2</sub> )<br>(R <sup>2</sup> =0.83, Q <sup>2</sup> =0.63)            | 0.97            | Regression  | 5                  | 91497.7        | 18299.5     | 11.1942 | 0.001   |
|                                                                                       |                 | Lack of fit | 9                  | 17623.3        | 1958.14     | 10.912  | 0.087   |
|                                                                                       |                 | Pure error  | 2                  | 358.896        | 179.448     |         |         |
| Syringic acid (Y <sub>3</sub> )<br>(R <sup>2</sup> =0.88, Q <sup>2</sup> =0.59)       | 0.81            | Regression  | 6                  | 23.7157        | 3.95262     | 11.1702 | 0.001   |
|                                                                                       |                 | Lack of fit | 7                  | 2.51674        | 0.359534    | 1.07654 | 0.561   |
|                                                                                       |                 | Pure error  | 2                  | 0.667942       | 0.333971    |         |         |
| Gallic acid (Y <sub>4</sub> )<br>(R <sup>2</sup> =0.83, Q <sup>2</sup> =0.73)         | 0.98            | Regression  | 4                  | 10194.3        | 2548.57     | 15.5436 | 0.001   |
|                                                                                       |                 | Lack of fit | 10                 | 1941.7         | 194.17      | 15.0162 | 0.064   |
|                                                                                       |                 | Pure error  | 2                  | 25.8614        | 12.9307     |         |         |
| Protocatechuic acid (Y <sub>5</sub> )<br>(R <sup>2</sup> =0.91, Q <sup>2</sup> =0.71) | 0.97            | Regression  | 5                  | 33137.3        | 6627.46     | 20.6287 | 0.001   |
|                                                                                       |                 | Lack of fit | 8                  | 3080.17        | 385.021     | 5.8091  | 0.155   |
|                                                                                       |                 | Pure error  | 2                  | 132.558        | 66.2791     |         |         |
| Vanillic acid (Y <sub>6</sub> )<br>(R <sup>2</sup> =0.83, Q <sup>2</sup> =0.64)       | 0.95            | Regression  | 5                  | 741.904        | 148.381     | 11.246  | 0.001   |
|                                                                                       |                 | Lack of fit | 9                  | 140.59         | 15.6211     | 6.8744  | 0.133   |
|                                                                                       |                 | Pure error  | 2                  | 4.54473        | 2.27237     |         |         |
| p-Coumaric acid (Y <sub>7</sub> )<br>(R <sup>2</sup> =0.84, Q <sup>2</sup> =0.68)     | 0.96            | Regression  | 5                  | 53.2525        | 10.6505     | 11.9547 | 0.001   |
|                                                                                       |                 | Lack of fit | 9                  | 9.50473        | 1.05608     | 7.15409 | 0.129   |
|                                                                                       |                 | Pure error  | 2                  | 0.295239       | 0.147619    |         |         |
| Ferulic acid (Y <sub>8</sub> )<br>(R <sup>2</sup> =0.75, Q <sup>2</sup> =0.47)        | 0.92            | Regression  | 7                  | 24.823         | 3.54615     | 4.02297 | 0.028   |
|                                                                                       |                 | Lack of fit | 7                  | 7.64398        | 1.092       | 7.54937 | 0.122   |
|                                                                                       |                 | Pure error  | 2                  | 0.289295       | 0.144647    |         |         |
| Hyperoside (Y <sub>9</sub> )<br>(R <sup>2</sup> =0.88, Q <sup>2</sup> =0.66)          | 0.96            | Regression  | 5                  | 4446.64        | 889.328     | 17.3971 | 0.001   |
|                                                                                       |                 | Lack of fit | 9                  | 538.734        | 59.8593     | 5.07763 | 0.175   |
|                                                                                       |                 | Pure error  | 2                  | 23.5777        | 11.7888     |         |         |
| Isoquercitrin (Y <sub>10</sub> )<br>(R <sup>2</sup> =0.87, Q <sup>2</sup> =0.55)      | 0.95            | Regression  | 6                  | 427.541        | 71.2568     | 11.1563 | 0.001   |
|                                                                                       |                 | Lack of fit | 8                  | 60.9784        | 7.6223      | 5.26948 | 0.169   |
|                                                                                       |                 | Pure error  | 2                  | 2.893          | 1.4465      |         |         |
| Quercitrin (Y <sub>11</sub> )<br>(R <sup>2</sup> =0.89, Q <sup>2</sup> =0.76)         | 0.98            | Regression  | 4                  | 21696.5        | 5424.12     | 25.0412 | 0.001   |
|                                                                                       |                 | Lack of fit | 10                 | 2563.78        | 256.378     | 14.4347 | 0.066   |
|                                                                                       |                 | Pure error  | 2                  | 35.5223        | 17.7611     |         |         |

| Quantifiable responses                                                             | Reproducibility | Source      | Degrees of freedom | Sum of squares             | Mean square                | F value  | p value |
|------------------------------------------------------------------------------------|-----------------|-------------|--------------------|----------------------------|----------------------------|----------|---------|
| Stigmasterol (Y <sub>12</sub> )<br>(R <sup>2</sup> =0.94, Q <sup>2</sup> =0.84)    | 0.87            | Regression  | 6                  | 90258.8                    | 15043.1                    | 24.7512  | 0.001   |
|                                                                                    |                 | Lack of fit | 7                  | 3851.44                    | 550.206                    | 0.679889 | 0.707   |
|                                                                                    |                 | Pure error  | 2                  | 1618.52                    | 809.259                    |          |         |
| Campesterol (Y <sub>13</sub> )<br>(R <sup>2</sup> =0.91, Q <sup>2</sup> =0.65)     | 0.91            | Regression  | 6                  | 3009.65                    | 501.609                    | 14.5167  | 0.001   |
|                                                                                    |                 | Lack of fit | 6                  | 236.115                    | 39.3525                    | 1.95216  | 0.377   |
|                                                                                    |                 | Pure error  | 2                  | 40.317                     | 20.1585                    |          |         |
| Beta-sitosterol (Y <sub>14</sub> )<br>(R <sup>2</sup> =0.90, Q <sup>2</sup> =0.74) | 0.66            | Regression  | 5                  | 4.92551 x 10 <sup>-7</sup> | 9.85102 x 10 <sup>-6</sup> | 19.9981  | 0.001   |
|                                                                                    |                 | Lack of fit | 9                  | 3.10315 x 10 <sup>-6</sup> | 344794                     | 0.297825 | 0.919   |
|                                                                                    |                 | Pure error  | 2                  | 2.31541 x 10 <sup>-6</sup> | 1.15771 x 10 <sup>-6</sup> |          |         |

R<sup>2</sup>, coefficient of correlation/goodness of fit; Q<sup>2</sup>, goodness of prediction; F-value, Fischer's ratio; p-value, probability.

**Supplementary Table S7.** Regression equation coefficients for individual bioactive compounds in hazelnut involucre extracts.

| Effect                            | Response       |                 |                |                 |                 |                |                |                 |                |                 |                 |                 |                 |                 |
|-----------------------------------|----------------|-----------------|----------------|-----------------|-----------------|----------------|----------------|-----------------|----------------|-----------------|-----------------|-----------------|-----------------|-----------------|
|                                   | Y <sub>1</sub> | Y <sub>2</sub>  | Y <sub>3</sub> | Y <sub>4</sub>  | Y <sub>5</sub>  | Y <sub>6</sub> | Y <sub>7</sub> | Y <sub>8</sub>  | Y <sub>9</sub> | Y <sub>10</sub> | Y <sub>11</sub> | Y <sub>12</sub> | Y <sub>13</sub> | Y <sub>14</sub> |
| Constant                          | <b>2.3158</b>  | <b>163.541</b>  | <b>2.9321</b>  | <b>60.6602</b>  | <b>107.796</b>  | <b>15.8665</b> | <b>4.1033</b>  | <b>2.4923</b>   | <b>36.7938</b> | <b>9.9322</b>   | <b>84.9785</b>  | <b>173.102</b>  | <b>30.1594</b>  | <b>4132.6</b>   |
| X <sub>1</sub> (stirring time)    | -0.0661        | -4.8247         | -0.3068        | -2.5678         | -4.1189         | -1.2804        | -0.2628        | <b>-0.54002</b> | -0.0929        | 0.45407         | -0.1204         | 2.6079          | 2.6029          | 310.19          |
| X <sub>2</sub> (pH)               | 0.1786         | 4.4255          | -0.1990        | 1.1239          | -0.3423         | 0.8882         | 0.1804         | 0.3328          | 0.7309         | -0.1229         | 1.3394          | -6.7831         | 0.20101         | -75.5127        |
| X <sub>3</sub> (water in solvent) | <b>1.0532</b>  | <b>61.553</b>   | <b>0.70418</b> | <b>18.8426</b>  | <b>40.4439</b>  | <b>5.4662</b>  | -0.4790        | 0.00229         | <b>14.5517</b> | <b>4.6248</b>   | <b>32.0497</b>  | <b>-25.6402</b> | <b>-6.4099</b>  | <b>-799.437</b> |
| X <sub>3</sub> x X <sub>3</sub>   | <b>-0.6276</b> | <b>-58.7996</b> | <b>-1.1265</b> | <b>-20.4025</b> | <b>-29.5338</b> | <b>-4.3143</b> | <b>-1.8433</b> | <b>-1.1561</b>  | <b>-9.6238</b> | <b>-2.8291</b>  | <b>-22.2799</b> | <b>-85.5579</b> | <b>-16.3786</b> | <b>-1570.93</b> |
| X <sub>1</sub> x X <sub>2</sub>   | -0.2968        | -               | -0.2878        | -               | -6.6490         | -1.1849        | -              | -0.2718         | -1.8656        | -               | -               | -               | -               | -               |
| X <sub>2</sub> x X <sub>2</sub>   | -              | 12.3175         | -              | -               | -               | -              | -0.4836        | -               | -              | -               | -               | -               | -1.9819         | -508.699        |
| X <sub>1</sub> x X <sub>3</sub>   | -              | -               | -0.25007       | -               | -               | -              | -              | -0.2806         | -              | 0.9081          | -               | -4.0675         | -               | -               |
| X <sub>2</sub> x X <sub>3</sub>   | -              | -               | -              | -               | -               | -              | -              | 0.2388          | -              | -               | -               | -               | -               | -               |
| X <sub>1</sub> x X <sub>1</sub>   | -              | -               | -              | -               | -               | -              | -              | -               | -              | 0.9381          | -               | -14.0906        | 0.9479          | -               |

Y<sub>1</sub> – Epicatechin; Y<sub>2</sub> – Catechin; Y<sub>3</sub> – Syringic acid; Y<sub>4</sub> – Gallic acid; Y<sub>5</sub> – Protocatechuic acid; Y<sub>6</sub> – Vanillic acid; Y<sub>7</sub> – *p*-Coumaric acid; Y<sub>8</sub> – Ferulic acid; Y<sub>9</sub> – Hyperoside; Y<sub>10</sub> – Isoquercitrin; Y<sub>11</sub> – Quercitrin; Y<sub>12</sub> – Stigmasterol; Y<sub>13</sub> – Campesterol; Y<sub>14</sub> – Beta-sitosterol. For data in bold, p-value was <0.005, therefore statistically significant.



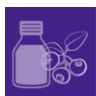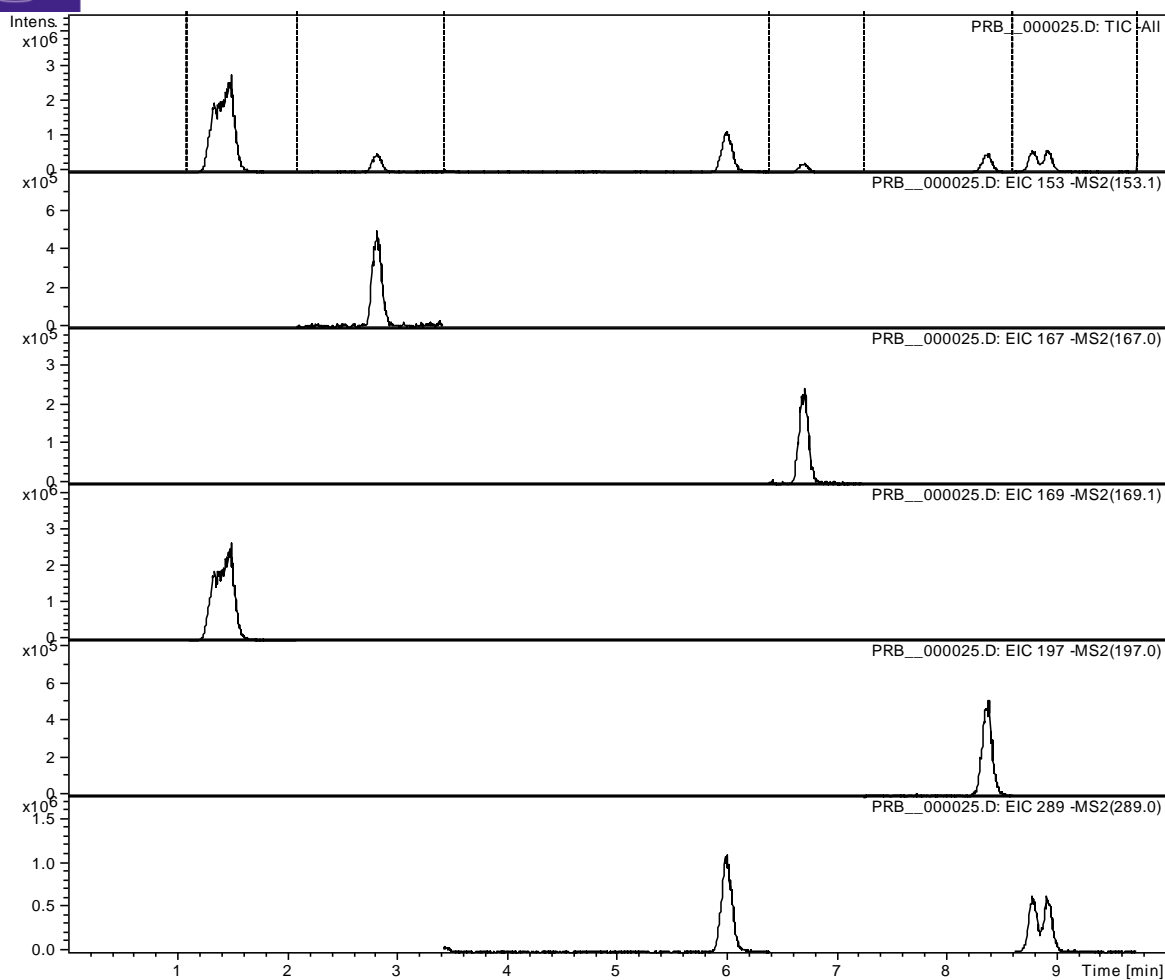

**Supplementary Figure S1.** The chromatograms for the individual polyphenolic compounds quantified by the LC-MS method II according to the retention time and *m/z* values in Supplementary Table 2.

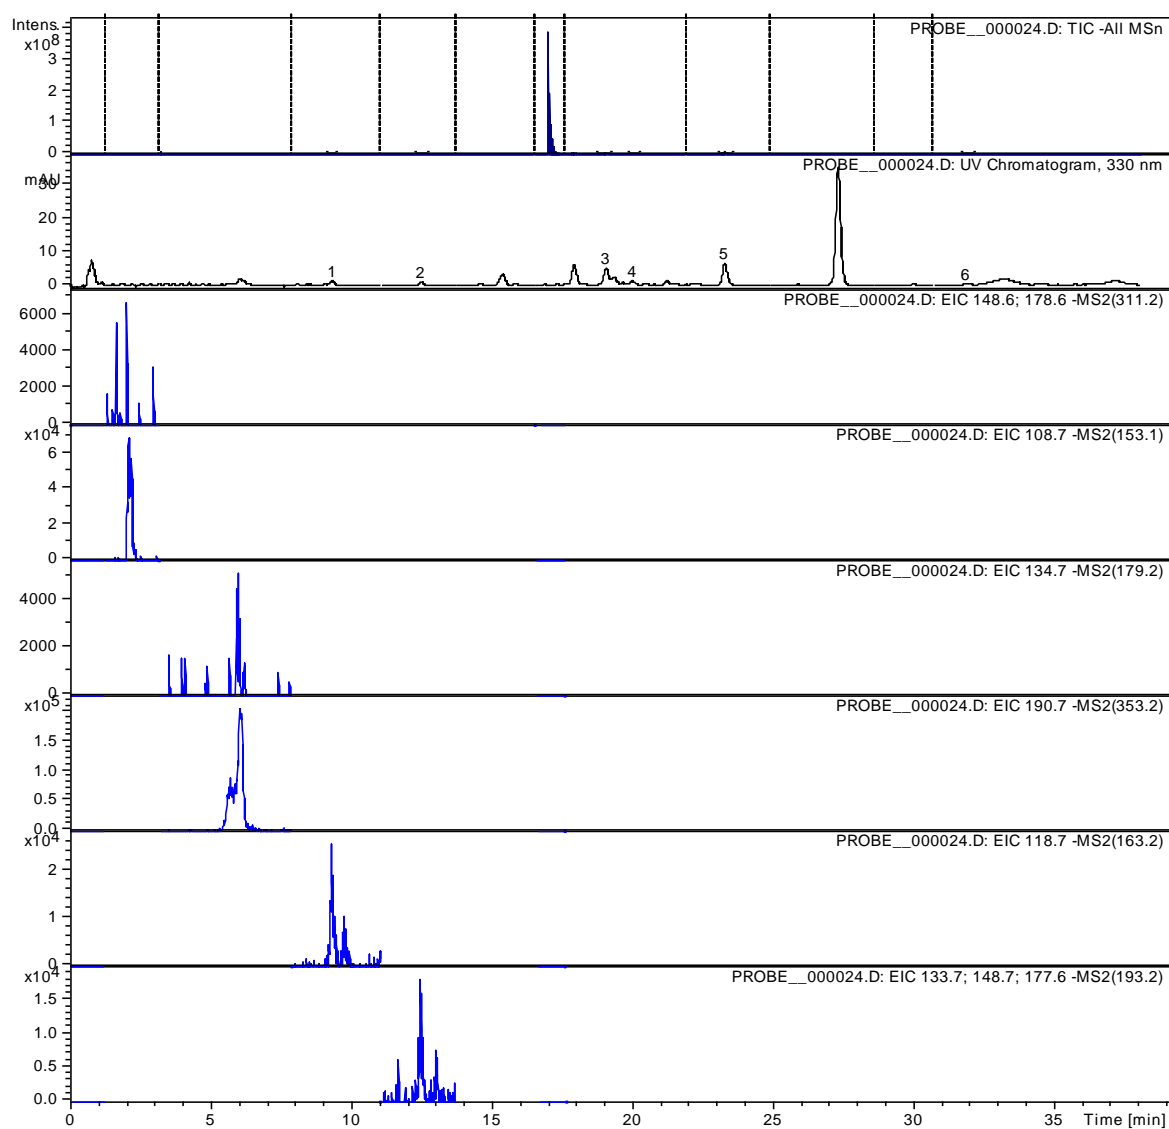

**Supplementary Figure S2.** The chromatograms for the individual polyphenolic compounds quantified by an LC-MS method according to the retention time and m/z values in Supplementary Table 1.

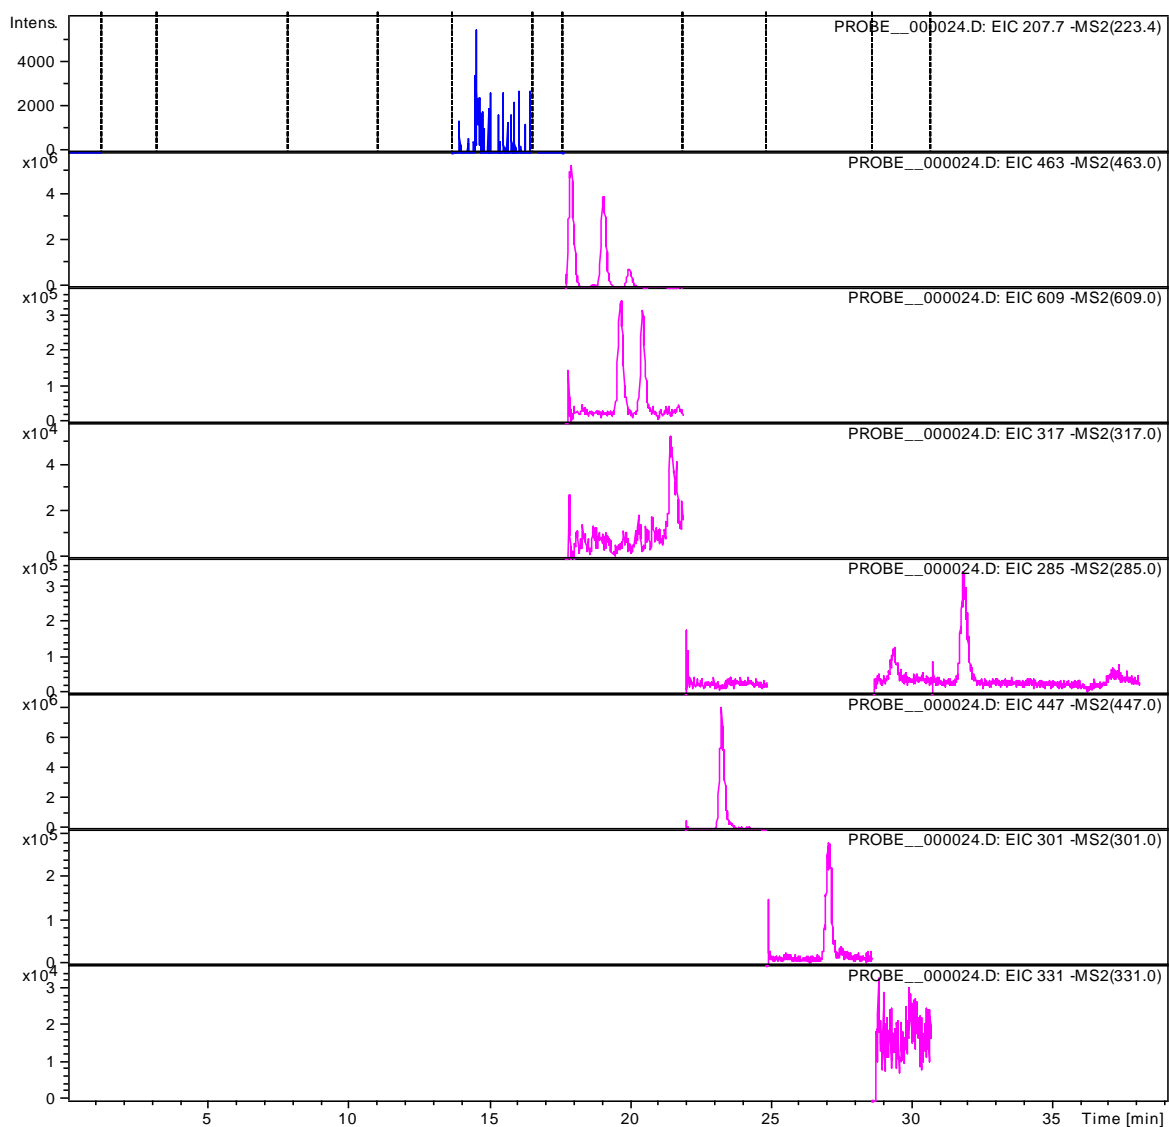

**Supplementary Figure S3.** The chromatograms for the individual polyphenolic compounds quantified by an LC-MS method according to the retention time and m/z values in Supplementary Table 1.

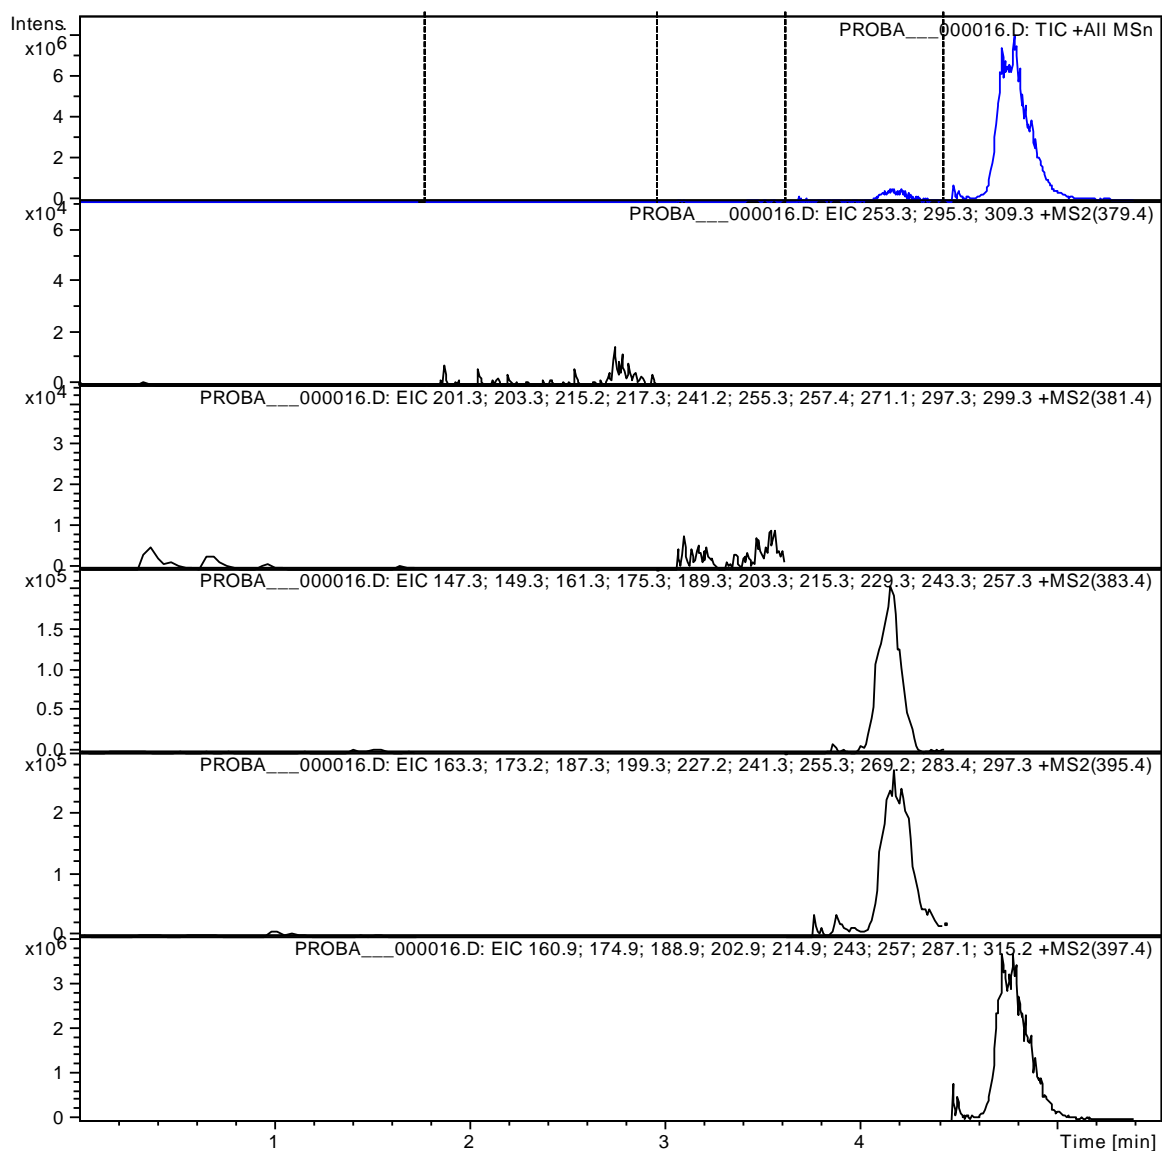

**Supplementary Figure S4.** The chromatograms for phytosterols quantified by an LC-MS/MS method according to the retention time and m/z values in Supplementary Table 3.
